# Supplementary material
Source: publisher site journal article supplement (https://www.spandidos-publications.com/5316/downloadSupplementary)

Figure S1. Magnetic resonance scan of pelvic lesion after chemotherapy. The red arrows point to the location of pelvic lesion.

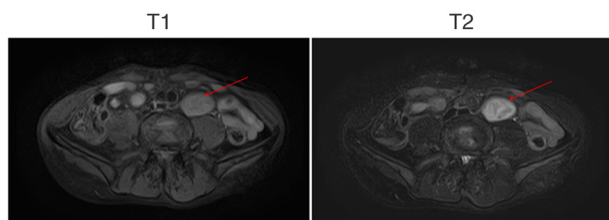

Supplement: Supplementary file 1 [file downloadSupplementary]
